# Supplementary material
Source: PubMed Central journal article supplement (PMC3049476)
Supplement: jcbfm201055x1.pdf [file jcbfm201055x1.pdf]

# Supplementary information

## Kinetic parameter estimates

**Table S1.** Comparison of the one- and two-tissue compartment models for description of [<sup>11</sup>C]AZ10419369 binding in the cerebellar cortex of ten control subjects.

| Subject | Model   | $K_1$<br>(mL·cm <sup>-3</sup> ·min <sup>-1</sup> ) | $k_2$<br>(min <sup>-1</sup> ) | $k_5$<br>(min <sup>-1</sup> ) | $k_6$<br>(min <sup>-1</sup> ) | $k_5/k_6$ | SS  | AIC | F<br>statistics |
|---------|---------|----------------------------------------------------|-------------------------------|-------------------------------|-------------------------------|-----------|-----|-----|-----------------|
| A       | 1-TC    | 0.07                                               | 0.13                          | -                             | -                             | -         | 61  | 197 | ns              |
|         | 2-TC(1) | 0.08                                               | 0.28                          | 0.11                          | 0.11                          | 1.02      | 55  | 198 |                 |
| B       | 1-TC    | 0.07                                               | 0.20                          | -                             | -                             | -         | 47  | 200 | ns              |
|         | 2-TC(1) | 0.07                                               | 0.20                          | 0.00                          | 4.55                          | 0.00      | 47  | 204 |                 |
| C       | 1-TC    | 0.09                                               | 0.22                          | -                             | -                             | -         | 46  | 217 | ns              |
|         | 2-TC(1) | 0.09                                               | 0.24                          | 0.02                          | 0.31                          | 0.08      | 46  | 221 |                 |
| D       | 1-TC    | 0.15                                               | 0.20                          | -                             | -                             | -         | 30  | 188 | ns              |
|         | 2-TC(1) | 0.17                                               | 0.27                          | 0.36                          | 2.71                          | 0.13      | 29  | 191 |                 |
| E       | 1-TC    | 0.15                                               | 0.14                          | -                             | -                             | -         | 34  | 176 | p<0.0001        |
|         | 2-TC(1) | 0.73                                               | 7.99                          | 1.55                          | 0.13                          | 12.01     | 10  | 147 |                 |
| F       | 1-TC    | 0.06                                               | 0.26                          | -                             | -                             | -         | 102 | 227 | ns              |
|         | 2-TC(1) | 0.06                                               | 0.29                          | 0.98                          | 7.16                          | 0.14      | 102 | 231 |                 |
| G       | 1-TC    | 0.03                                               | 0.13                          | -                             | -                             | -         | 23  | 206 | ns              |
|         | 2-TC(1) | 0.03                                               | 0.13                          | 0.00                          | 0.03                          | 0.01      | 23  | 210 |                 |
| H       | 1-TC    | 0.15                                               | 0.20                          | -                             | -                             | -         | 22  | 174 | p<0.0001        |
|         | 2-TC(1) | 0.67                                               | 7.97                          | 1.69                          | 0.20                          | 8.62      | 7   | 146 |                 |
| I       | 1-TC    | 0.03                                               | 0.18                          | -                             | -                             | -         | 19  | 205 | ns              |
|         | 2-TC(1) | 0.03                                               | 0.20                          | 0.21                          | 1.60                          | 0.13      | 19  | 209 |                 |
| J       | 1-TC    | 0.02                                               | 0.26                          | -                             | -                             | -         | 85  | 219 | ns              |
|         | 2-TC(1) | 0.02                                               | 0.27                          | 0.01                          | 0.17                          | 0.07      | 85  | 223 |                 |

1-TC, one-tissue compartment model; 2-TC(1), unconstrained two-tissue compartment model; SS, residual sum of squares; AIC, Akaike information criterion; ns, not significant.

## Linear regression analysis of binding parameters obtained with different methods

**Table S2.** Linear regression analysis of  $V_T$  and  $BP_{ND}$  estimates obtained with different methods.

| Parameter | Method 1  | Method 2 | All regions |           |       | Pallidum excluded |           |       |
|-----------|-----------|----------|-------------|-----------|-------|-------------------|-----------|-------|
|           |           |          | Slope       | Intercept | $r^2$ | Slope             | Intercept | $r^2$ |
| $V_T$     | 1-TC      | 2-TC(2)  | 0.975       | 0.004     | 0.998 | 0.983             | 0.001     | 0.999 |
|           | Logan     | 2-TC(2)  | 0.951       | 0.014     | 0.993 | 0.979             | -0.0003   | 0.999 |
|           | Logan     | 1-TC     | 0.973       | 0.015     | 0.993 | 0.995             | 0.004     | 0.998 |
| $BP_{ND}$ | SRTM      | 2-TC(2)  | 0.845       | 0.024     | 0.899 | 0.837             | 0.019     | 0.917 |
|           | Logan     | 2-TC(2)  | 0.735       | 0.135     | 0.861 | 0.852             | 0.003     | 0.931 |
|           | Logan ref | 2-TC(2)  | 0.703       | 0.175     | 0.810 | 0.849             | 0.003     | 0.923 |
|           | Logan ref | Logan    | 0.959       | 0.043     | 0.947 | 0.999             | -0.003    | 0.996 |
|           | Logan     | SRTM     | 0.862       | 0.124     | 0.939 | 1.006             | -0.004    | 0.991 |
|           | Logan ref | SRTM     | 0.817       | 0.172     | 0.871 | 1.009             | -0.010    | 0.994 |

1-TC, One-tissue compartment model; 2-TC(2), two-tissue compartment model with fixed  $K_1/k_2$  ratio; Logan, Logan linear graphical analysis with arterial input; Logan ref, Logan linear graphical analysis with reference tissue; SRTM, simplified reference tissue model. Slope and intercept were determined by linear fit of (Method 1) = slope \* (Method 2) + intercept, including data for 9 subjects.

# Stability of $V_T$ for PET measurement duration

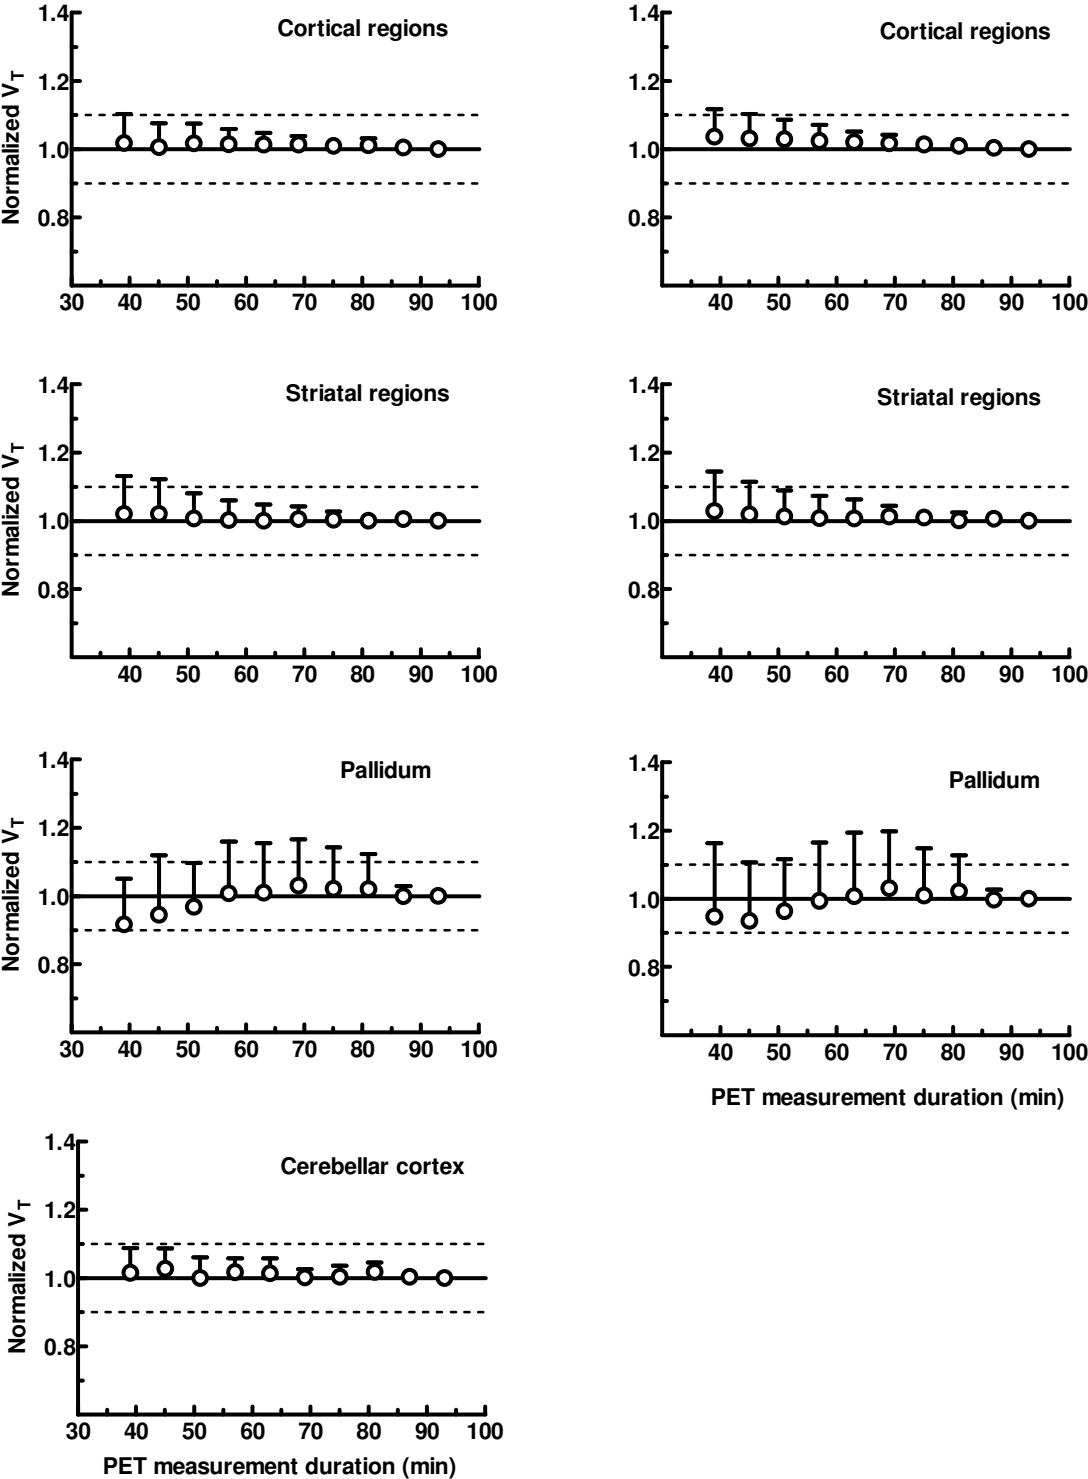

**Figure S1.** Time stability of [ $^{11}\text{C}$ ]AZ10419369  $V_T$  values obtained by the one-tissue compartment model (left panel) and the two-tissue compartment model with fixed  $K_1/k_2$  ratio (right panel). Values are expressed relative to  $V_T$  obtained with a 93 minute PET measurement. Data points and error bars represent mean and SD, respectively.
